# Supplementary material for: A pilot study of nintedanib in molecularly selected patients with advanced non-small cell lung cancer
Source: PubMed Central journal article supplement — J Thorac Dis. 2024 Jun 12;16(6):3782–93. doi: 10.21037/jtd-23-1717 (PMC11228753; doi:10.21037/jtd-23-1717), 2024-06-12
Supplement: jtd-16-06-3782-coif.pdf [file jtd-16-06-3782-coif.pdf]

## ICMJE DISCLOSURE FORM

Date: 4/11/2024

Your Name: Christine Auberle

Manuscript Title: A pilot study of nintedanib in molecularly selected patients with advanced non-small cell lung cancer

Manuscript number (if known): \_\_\_\_\_

In the interest of transparency, we ask you to disclose all relationships/activities/interests listed below that are related to the content of your manuscript. "Related" means any relation with for-profit or not-for-profit third parties whose interests may be affected by the content of the manuscript. Disclosure represents a commitment to transparency and does not necessarily indicate a bias. If you are in doubt about whether to list a relationship/activity/interest, it is preferable that you do so.

The following questions apply to the author's relationships/activities/interests as they relate to the **current manuscript only**.

The author's relationships/activities/interests should be **defined broadly**. For example, if your manuscript pertains to the epidemiology of hypertension, you should declare all relationships with manufacturers of antihypertensive medication, even if that medication is not mentioned in the manuscript.

In item #1 below, report all support for the work reported in this manuscript without time limit. For all other items, the time frame for disclosure is the past 36 months.

|                                                           |                                                                                                                                                                                | Name all entities with whom you have this relationship or indicate none (add rows as needed)                                                                                                                                                                                                                                                                                                                                                                                                                  | Specifications/Comments (e.g., if payments were made to you or to your institution) |
|-----------------------------------------------------------|--------------------------------------------------------------------------------------------------------------------------------------------------------------------------------|---------------------------------------------------------------------------------------------------------------------------------------------------------------------------------------------------------------------------------------------------------------------------------------------------------------------------------------------------------------------------------------------------------------------------------------------------------------------------------------------------------------|-------------------------------------------------------------------------------------|
| <b>Time frame: Since the initial planning of the work</b> |                                                                                                                                                                                |                                                                                                                                                                                                                                                                                                                                                                                                                                                                                                               |                                                                                     |
| 1                                                         | All support for the present manuscript (e.g., funding, provision of study materials, medical writing, article processing charges, etc.)<br><b>No time limit for this item.</b> | This study was funded by the National Comprehensive Cancer Network (NCCN) Oncology Research Program as an independent, investigator-initiated study supported through a grant from Boehringer Ingelheim Pharmaceuticals, Inc (BIPI). BIPI had no role in the design, analysis, or interpretation of the results in this study; BIPI was given the opportunity to review the manuscript for medical and scientific accuracy as it relates to BIPI substances, as well as intellectual property considerations. | Funding to Institution                                                              |
|                                                           |                                                                                                                                                                                |                                                                                                                                                                                                                                                                                                                                                                                                                                                                                                               |                                                                                     |
|                                                           |                                                                                                                                                                                |                                                                                                                                                                                                                                                                                                                                                                                                                                                                                                               |                                                                                     |
|                                                           |                                                                                                                                                                                |                                                                                                                                                                                                                                                                                                                                                                                                                                                                                                               |                                                                                     |

|                                   |                                                                                                              |                                          |  |
|-----------------------------------|--------------------------------------------------------------------------------------------------------------|------------------------------------------|--|
|                                   |                                                                                                              |                                          |  |
|                                   |                                                                                                              |                                          |  |
| <b>Time frame: past 36 months</b> |                                                                                                              |                                          |  |
| 2                                 | Grants or contracts from any entity (if not indicated in item #1 above).                                     | <input checked="" type="checkbox"/> None |  |
| 3                                 | Royalties or licenses                                                                                        | <input checked="" type="checkbox"/> None |  |
| 4                                 | Consulting fees                                                                                              | <input checked="" type="checkbox"/> None |  |
| 5                                 | Payment or honoraria for lectures, presentations, speakers bureaus, manuscript writing or educational events | <input checked="" type="checkbox"/> None |  |
| 6                                 | Payment for expert testimony                                                                                 | <input checked="" type="checkbox"/> None |  |
| 7                                 | Support for attending meetings and/or travel                                                                 | <input checked="" type="checkbox"/> None |  |
| 8                                 | Patents planned, issued or pending                                                                           | <input checked="" type="checkbox"/> None |  |
| 9                                 | Participation on a Data Safety Monitoring Board or Advisory Board                                            | <input checked="" type="checkbox"/> None |  |
| 10                                | Leadership or fiduciary role in other board, society, committee or advocacy group, paid or unpaid            | <input checked="" type="checkbox"/> None |  |
| 11                                | Stock or stock options                                                                                       | <input checked="" type="checkbox"/> None |  |
| 12                                | Receipt of equipment, materials, drugs, medical writing, gifts or other services                             | <input checked="" type="checkbox"/> None |  |
| 13                                | Other financial or non-financial interests                                                                   | <input checked="" type="checkbox"/> None |  |

**Please summarize the above conflict of interest in the following box:**

This study was funded by the National Comprehensive Cancer Network (NCCN) Oncology Research Program as an independent, investigator-initiated study supported through a grant from Boehringer Ingelheim Pharmaceuticals, Inc (BIPI). BIPI had no role in the design, analysis, or interpretation of the results in this study; BIPI was given the opportunity to review the manuscript for medical and scientific accuracy as it relates to BIPI substances, as well as intellectual property considerations. The funding was provided to the institution.

**Please place an “X” next to the following statement to indicate your agreement:**

**X   I certify that I have answered every question and have not altered the wording of any of the questions on this form.**

## ICMJE DISCLOSURE FORM

Date: 4/11/2024

Your Name: Feng Gao

Manuscript Title: A pilot study of nintedanib in molecularly selected patients with advanced non-small cell lung cancer

Manuscript number (if known): \_\_\_\_\_

In the interest of transparency, we ask you to disclose all relationships/activities/interests listed below that are related to the content of your manuscript. "Related" means any relation with for-profit or not-for-profit third parties whose interests may be affected by the content of the manuscript. Disclosure represents a commitment to transparency and does not necessarily indicate a bias. If you are in doubt about whether to list a relationship/activity/interest, it is preferable that you do so.

The following questions apply to the author's relationships/activities/interests as they relate to the current manuscript only.

The author's relationships/activities/interests should be defined broadly. For example, if your manuscript pertains to the epidemiology of hypertension, you should declare all relationships with manufacturers of antihypertensive medication, even if that medication is not mentioned in the manuscript.

In item #1 below, report all support for the work reported in this manuscript without time limit. For all other items, the time frame for disclosure is the past 36 months.

|                                                           |                                                                                                                                                                                | Name all entities with whom you have this relationship or indicate none (add rows as needed)                                                                                                                                                                                                                                                                                                                                                                                                                  | Specifications/Comments (e.g., if payments were made to you or to your institution) |
|-----------------------------------------------------------|--------------------------------------------------------------------------------------------------------------------------------------------------------------------------------|---------------------------------------------------------------------------------------------------------------------------------------------------------------------------------------------------------------------------------------------------------------------------------------------------------------------------------------------------------------------------------------------------------------------------------------------------------------------------------------------------------------|-------------------------------------------------------------------------------------|
| <b>Time frame: Since the initial planning of the work</b> |                                                                                                                                                                                |                                                                                                                                                                                                                                                                                                                                                                                                                                                                                                               |                                                                                     |
| 1                                                         | All support for the present manuscript (e.g., funding, provision of study materials, medical writing, article processing charges, etc.)<br><b>No time limit for this item.</b> | This study was funded by the National Comprehensive Cancer Network (NCCN) Oncology Research Program as an independent, investigator-initiated study supported through a grant from Boehringer Ingelheim Pharmaceuticals, Inc (BIPI). BIPI had no role in the design, analysis, or interpretation of the results in this study; BIPI was given the opportunity to review the manuscript for medical and scientific accuracy as it relates to BIPI substances, as well as intellectual property considerations. | Institution                                                                         |
|                                                           |                                                                                                                                                                                |                                                                                                                                                                                                                                                                                                                                                                                                                                                                                                               |                                                                                     |
|                                                           |                                                                                                                                                                                |                                                                                                                                                                                                                                                                                                                                                                                                                                                                                                               |                                                                                     |
|                                                           |                                                                                                                                                                                |                                                                                                                                                                                                                                                                                                                                                                                                                                                                                                               |                                                                                     |

|                                   |                                                                                                              |                                          |  |
|-----------------------------------|--------------------------------------------------------------------------------------------------------------|------------------------------------------|--|
|                                   |                                                                                                              |                                          |  |
|                                   |                                                                                                              |                                          |  |
|                                   |                                                                                                              |                                          |  |
| <b>Time frame: past 36 months</b> |                                                                                                              |                                          |  |
| 2                                 | Grants or contracts from any entity (if not indicated in item #1 above).                                     | <input checked="" type="checkbox"/> None |  |
| 3                                 | Royalties or licenses                                                                                        | <input checked="" type="checkbox"/> None |  |
| 4                                 | Consulting fees                                                                                              | <input checked="" type="checkbox"/> None |  |
| 5                                 | Payment or honoraria for lectures, presentations, speakers bureaus, manuscript writing or educational events | <input checked="" type="checkbox"/> None |  |
| 6                                 | Payment for expert testimony                                                                                 | <input checked="" type="checkbox"/> None |  |
| 7                                 | Support for attending meetings and/or travel                                                                 | <input checked="" type="checkbox"/> None |  |
| 8                                 | Patents planned, issued or pending                                                                           | <input checked="" type="checkbox"/> None |  |
| 9                                 | Participation on a Data Safety Monitoring Board or Advisory Board                                            | <input checked="" type="checkbox"/> None |  |
| 10                                | Leadership or fiduciary role in other board, society, committee or advocacy group, paid or unpaid            | <input checked="" type="checkbox"/> None |  |
| 11                                | Stock or stock options                                                                                       | <input checked="" type="checkbox"/> None |  |
| 12                                | Receipt of equipment, materials, drugs, medical writing, gifts or other services                             | <input checked="" type="checkbox"/> None |  |
| 13                                | Other financial or non-financial interests                                                                   | <input checked="" type="checkbox"/> None |  |

**Please summarize the above conflict of interest in the following box:**

This study was funded by the National Comprehensive Cancer Network (NCCN) Oncology Research Program as an independent, investigator-initiated study supported through a grant from Boehringer Ingelheim Pharmaceuticals, Inc (BIPI). BIPI had no role in the design, analysis, or interpretation of the results in this study; BIPI was given the opportunity to review the manuscript for medical and scientific accuracy as it relates to BIPI substances, as well as intellectual property considerations. The funding was provided to the institution.

Please place an "X" next to the following statement to indicate your agreement:

I certify that I have answered every question and have not altered the wording of any of the questions on this form.

## ICMJE DISCLOSURE FORM

Date: 4/11/2024

Your Name: Mark Sloan

Manuscript Title: A pilot study of nintedanib in molecularly selected patients with advanced non-small cell lung cancer

Manuscript number (if known): \_\_\_\_\_

In the interest of transparency, we ask you to disclose all relationships/activities/interests listed below that are related to the content of your manuscript. "Related" means any relation with for-profit or not-for-profit third parties whose interests may be affected by the content of the manuscript. Disclosure represents a commitment to transparency and does not necessarily indicate a bias. If you are in doubt about whether to list a relationship/activity/interest, it is preferable that you do so.

The following questions apply to the author's relationships/activities/interests as they relate to the current manuscript only.

The author's relationships/activities/interests should be defined broadly. For example, if your manuscript pertains to the epidemiology of hypertension, you should declare all relationships with manufacturers of antihypertensive medication, even if that medication is not mentioned in the manuscript.

In item #1 below, report all support for the work reported in this manuscript without time limit. For all other items, the time frame for disclosure is the past 36 months.

|                                                           |                                                                                                                                                                                | Name all entities with whom you have this relationship or indicate none (add rows as needed)                                                                                                                                                                                                                                                                                                                                                                                                                  | Specifications/Comments (e.g., if payments were made to you or to your institution) |
|-----------------------------------------------------------|--------------------------------------------------------------------------------------------------------------------------------------------------------------------------------|---------------------------------------------------------------------------------------------------------------------------------------------------------------------------------------------------------------------------------------------------------------------------------------------------------------------------------------------------------------------------------------------------------------------------------------------------------------------------------------------------------------|-------------------------------------------------------------------------------------|
| <b>Time frame: Since the initial planning of the work</b> |                                                                                                                                                                                |                                                                                                                                                                                                                                                                                                                                                                                                                                                                                                               |                                                                                     |
| 1                                                         | All support for the present manuscript (e.g., funding, provision of study materials, medical writing, article processing charges, etc.)<br><b>No time limit for this item.</b> | This study was funded by the National Comprehensive Cancer Network (NCCN) Oncology Research Program as an independent, investigator-initiated study supported through a grant from Boehringer Ingelheim Pharmaceuticals, Inc (BIPI). BIPI had no role in the design, analysis, or interpretation of the results in this study; BIPI was given the opportunity to review the manuscript for medical and scientific accuracy as it relates to BIPI substances, as well as intellectual property considerations. | Institution                                                                         |
|                                                           |                                                                                                                                                                                |                                                                                                                                                                                                                                                                                                                                                                                                                                                                                                               |                                                                                     |
|                                                           |                                                                                                                                                                                |                                                                                                                                                                                                                                                                                                                                                                                                                                                                                                               |                                                                                     |
|                                                           |                                                                                                                                                                                |                                                                                                                                                                                                                                                                                                                                                                                                                                                                                                               |                                                                                     |

|                                   |                                                                                                              |                                          |  |
|-----------------------------------|--------------------------------------------------------------------------------------------------------------|------------------------------------------|--|
|                                   |                                                                                                              |                                          |  |
|                                   |                                                                                                              |                                          |  |
| <b>Time frame: past 36 months</b> |                                                                                                              |                                          |  |
| 2                                 | Grants or contracts from any entity (if not indicated in item #1 above).                                     | <input checked="" type="checkbox"/> None |  |
| 3                                 | Royalties or licenses                                                                                        | <input checked="" type="checkbox"/> None |  |
| 4                                 | Consulting fees                                                                                              | <input checked="" type="checkbox"/> None |  |
| 5                                 | Payment or honoraria for lectures, presentations, speakers bureaus, manuscript writing or educational events | <input checked="" type="checkbox"/> None |  |
| 6                                 | Payment for expert testimony                                                                                 | <input checked="" type="checkbox"/> None |  |
| 7                                 | Support for attending meetings and/or travel                                                                 | <input checked="" type="checkbox"/> None |  |
| 8                                 | Patents planned, issued or pending                                                                           | <input checked="" type="checkbox"/> None |  |
| 9                                 | Participation on a Data Safety Monitoring Board or Advisory Board                                            | <input checked="" type="checkbox"/> None |  |
| 10                                | Leadership or fiduciary role in other board, society, committee or advocacy group, paid or unpaid            | <input checked="" type="checkbox"/> None |  |
| 11                                | Stock or stock options                                                                                       | <input checked="" type="checkbox"/> None |  |
| 12                                | Receipt of equipment, materials, drugs, medical writing, gifts or other services                             | <input checked="" type="checkbox"/> None |  |
| 13                                | Other financial or non-financial interests                                                                   | <input checked="" type="checkbox"/> None |  |

**Please summarize the above conflict of interest in the following box:**



This study was funded by the National Comprehensive Cancer Network (NCCN) Oncology Research Program as an independent, investigator-initiated study supported through a grant from Boehringer Ingelheim Pharmaceuticals, Inc (BIPI). BIPI had no role in the design, analysis, or interpretation of the results in this study; BIPI was given the opportunity to review the manuscript for medical and scientific accuracy as it relates to BIPI substances, as well as intellectual property considerations. The funding was provided to the institution.

**Please place an "X" next to the following statement to indicate your agreement:**

**I certify that I have answered every question and have not altered the wording of any of the questions on this form.**

## ICMJE DISCLOSURE FORM

Date: 4/11/2024

Your Name: Daniel Morgenstern

Manuscript Title: A pilot study of nintedanib in molecularly selected patients with advanced non-small cell lung cancer

Manuscript number (if known): \_\_\_\_\_

In the interest of transparency, we ask you to disclose all relationships/activities/interests listed below that are related to the content of your manuscript. "Related" means any relation with for-profit or not-for-profit third parties whose interests may be affected by the content of the manuscript. Disclosure represents a commitment to transparency and does not necessarily indicate a bias. If you are in doubt about whether to list a relationship/activity/interest, it is preferable that you do so.

The following questions apply to the author's relationships/activities/interests as they relate to the current manuscript only.

The author's relationships/activities/interests should be defined broadly. For example, if your manuscript pertains to the epidemiology of hypertension, you should declare all relationships with manufacturers of antihypertensive medication, even if that medication is not mentioned in the manuscript.

In item #1 below, report all support for the work reported in this manuscript without time limit. For all other items, the time frame for disclosure is the past 36 months.

|                                                           |                                                                                                                                                                                | Name all entities with whom you have this relationship or indicate none (add rows as needed)                                                                                                                                                                                                                                                                                                                                                                                                                  | Specifications/Comments (e.g., if payments were made to you or to your institution) |
|-----------------------------------------------------------|--------------------------------------------------------------------------------------------------------------------------------------------------------------------------------|---------------------------------------------------------------------------------------------------------------------------------------------------------------------------------------------------------------------------------------------------------------------------------------------------------------------------------------------------------------------------------------------------------------------------------------------------------------------------------------------------------------|-------------------------------------------------------------------------------------|
| <b>Time frame: Since the initial planning of the work</b> |                                                                                                                                                                                |                                                                                                                                                                                                                                                                                                                                                                                                                                                                                                               |                                                                                     |
| 1                                                         | All support for the present manuscript (e.g., funding, provision of study materials, medical writing, article processing charges, etc.)<br><b>No time limit for this item.</b> | This study was funded by the National Comprehensive Cancer Network (NCCN) Oncology Research Program as an independent, investigator-initiated study supported through a grant from Boehringer Ingelheim Pharmaceuticals, Inc (BIPI). BIPI had no role in the design, analysis, or interpretation of the results in this study; BIPI was given the opportunity to review the manuscript for medical and scientific accuracy as it relates to BIPI substances, as well as intellectual property considerations. | Funding to the institution.                                                         |
|                                                           |                                                                                                                                                                                |                                                                                                                                                                                                                                                                                                                                                                                                                                                                                                               |                                                                                     |
|                                                           |                                                                                                                                                                                |                                                                                                                                                                                                                                                                                                                                                                                                                                                                                                               |                                                                                     |
|                                                           |                                                                                                                                                                                |                                                                                                                                                                                                                                                                                                                                                                                                                                                                                                               |                                                                                     |

| Time frame: past 36 months |                                                                                                              |                                                                                                                                                                                                                                                                      |                       |
|----------------------------|--------------------------------------------------------------------------------------------------------------|----------------------------------------------------------------------------------------------------------------------------------------------------------------------------------------------------------------------------------------------------------------------|-----------------------|
| 2                          | Grants or contracts from any entity (if not indicated in item #1 above).                                     | Research Funding: Heat Biologics, Merck, Celgene, AstraZeneca, Baxter, Incyte, AbbVie, Bristol Myers Squibb, EpicentRx, Pfizer, Roche, Lilly, Altum Pharmaceuticals, Array BioPharma, Surface Oncology, Arcus Biosciences, Boehringer Ingelheim, Y-mAbs Therapeutics | Institutional funding |
| 3                          | Royalties or licenses                                                                                        | <input checked="" type="checkbox"/> None                                                                                                                                                                                                                             |                       |
| 4                          | Consulting fees                                                                                              | <input checked="" type="checkbox"/> None                                                                                                                                                                                                                             |                       |
| 5                          | Payment or honoraria for lectures, presentations, speakers bureaus, manuscript writing or educational events | <input checked="" type="checkbox"/> None                                                                                                                                                                                                                             |                       |
| 6                          | Payment for expert testimony                                                                                 | <input checked="" type="checkbox"/> None                                                                                                                                                                                                                             |                       |
| 7                          | Support for attending meetings and/or travel                                                                 | <input checked="" type="checkbox"/> None                                                                                                                                                                                                                             |                       |
| 8                          | Patents planned, issued or pending                                                                           | <input checked="" type="checkbox"/> None                                                                                                                                                                                                                             |                       |
| 9                          | Participation on a Data Safety Monitoring Board or Advisory Board                                            | Advisory role for AbbVie, G1 therapeutics, Lilly Medical, Miratic therapeutics, Arcus Biosciences                                                                                                                                                                    | self                  |
| 10                         | Leadership or fiduciary role in other board, society, committee or advocacy group, paid or unpaid            | <input checked="" type="checkbox"/> None                                                                                                                                                                                                                             |                       |
| 11                         | Stock or stock options                                                                                       | <input checked="" type="checkbox"/> None                                                                                                                                                                                                                             |                       |
| 12                         | Receipt of equipment, materials, drugs, medical writing, gifts or other services                             | <input checked="" type="checkbox"/> None                                                                                                                                                                                                                             |                       |
| 13                         | Other financial or non-                                                                                      | <input checked="" type="checkbox"/> None                                                                                                                                                                                                                             |                       |

|                     |  |  |
|---------------------|--|--|
| financial interests |  |  |
|                     |  |  |

**Please summarize the above conflict of interest in the following box:**

This study was funded by the National Comprehensive Cancer Network (NCCN) Oncology Research Program as an independent, investigator-initiated study supported through a grant from Boehringer Ingelheim Pharmaceuticals, Inc (BIPI). BIPI had no role in the design, analysis, or interpretation of the results in this study; BIPI was given the opportunity to review the manuscript for medical and scientific accuracy as it relates to BIPI substances, as well as intellectual property considerations. The funding was provided to the institution.

DM also reports research funding from Heat Biologics, Merck, Celgene, AstraZeneca, Baxter, Incyte, AbbVie, Bristol Myers Squibb, EpicentRx, Pfizer, Roche, Lilly, Altum Pharmaceuticals, Array BioPharma, Surface Oncology, Arcus

**Please place an "X" next to the following statement to indicate your agreement:**

**I certify that I have answered every question and have not altered the wording of any of the questions on this form.**

## ICMJE DISCLOSURE FORM

Date: 4/11/2024

Your Name: Linda Winkler

Manuscript Title: A pilot study of nintedanib in molecularly selected patients with advanced non-small cell lung cancer

Manuscript number (if known): \_\_\_\_\_

In the interest of transparency, we ask you to disclose all relationships/activities/interests listed below that are related to the content of your manuscript. "Related" means any relation with for-profit or not-for-profit third parties whose interests may be affected by the content of the manuscript. Disclosure represents a commitment to transparency and does not necessarily indicate a bias. If you are in doubt about whether to list a relationship/activity/interest, it is preferable that you do so.

The following questions apply to the author's relationships/activities/interests as they relate to the current manuscript only.

The author's relationships/activities/interests should be defined broadly. For example, if your manuscript pertains to the epidemiology of hypertension, you should declare all relationships with manufacturers of antihypertensive medication, even if that medication is not mentioned in the manuscript.

In item #1 below, report all support for the work reported in this manuscript without time limit. For all other items, the time frame for disclosure is the past 36 months.

|                                                           |                                                                                                                                                                                | Name all entities with whom you have this relationship or indicate none (add rows as needed)                                                                                                                                                                                                                                                                                                                                                                                                                  | Specifications/Comments (e.g., if payments were made to you or to your institution) |
|-----------------------------------------------------------|--------------------------------------------------------------------------------------------------------------------------------------------------------------------------------|---------------------------------------------------------------------------------------------------------------------------------------------------------------------------------------------------------------------------------------------------------------------------------------------------------------------------------------------------------------------------------------------------------------------------------------------------------------------------------------------------------------|-------------------------------------------------------------------------------------|
| <b>Time frame: Since the initial planning of the work</b> |                                                                                                                                                                                |                                                                                                                                                                                                                                                                                                                                                                                                                                                                                                               |                                                                                     |
| 1                                                         | All support for the present manuscript (e.g., funding, provision of study materials, medical writing, article processing charges, etc.)<br><b>No time limit for this item.</b> | This study was funded by the National Comprehensive Cancer Network (NCCN) Oncology Research Program as an independent, investigator-initiated study supported through a grant from Boehringer Ingelheim Pharmaceuticals, Inc (BIPI). BIPI had no role in the design, analysis, or interpretation of the results in this study; BIPI was given the opportunity to review the manuscript for medical and scientific accuracy as it relates to BIPI substances, as well as intellectual property considerations. | Institution                                                                         |
|                                                           |                                                                                                                                                                                |                                                                                                                                                                                                                                                                                                                                                                                                                                                                                                               |                                                                                     |
|                                                           |                                                                                                                                                                                |                                                                                                                                                                                                                                                                                                                                                                                                                                                                                                               |                                                                                     |
|                                                           |                                                                                                                                                                                |                                                                                                                                                                                                                                                                                                                                                                                                                                                                                                               |                                                                                     |

|                                   |                                                                                                              |                                          |  |
|-----------------------------------|--------------------------------------------------------------------------------------------------------------|------------------------------------------|--|
|                                   |                                                                                                              |                                          |  |
|                                   |                                                                                                              |                                          |  |
| <b>Time frame: past 36 months</b> |                                                                                                              |                                          |  |
| 2                                 | Grants or contracts from any entity (if not indicated in item #1 above).                                     | <input checked="" type="checkbox"/> None |  |
| 3                                 | Royalties or licenses                                                                                        | <input checked="" type="checkbox"/> None |  |
| 4                                 | Consulting fees                                                                                              | <input checked="" type="checkbox"/> None |  |
| 5                                 | Payment or honoraria for lectures, presentations, speakers bureaus, manuscript writing or educational events | <input checked="" type="checkbox"/> None |  |
| 6                                 | Payment for expert testimony                                                                                 | <input checked="" type="checkbox"/> None |  |
| 7                                 | Support for attending meetings and/or travel                                                                 | <input checked="" type="checkbox"/> None |  |
| 8                                 | Patents planned, issued or pending                                                                           | <input checked="" type="checkbox"/> None |  |
| 9                                 | Participation on a Data Safety Monitoring Board or Advisory Board                                            | <input checked="" type="checkbox"/> None |  |
| 10                                | Leadership or fiduciary role in other board, society, committee or advocacy group, paid or unpaid            | <input checked="" type="checkbox"/> None |  |
| 11                                | Stock or stock options                                                                                       | <input checked="" type="checkbox"/> None |  |
| 12                                | Receipt of equipment, materials, drugs, medical writing, gifts or other services                             | <input checked="" type="checkbox"/> None |  |
| 13                                | Other financial or non-financial interests                                                                   | <input checked="" type="checkbox"/> None |  |

**Please summarize the above conflict of interest in the following box:**

This study was funded by the National Comprehensive Cancer Network (NCCN) Oncology Research Program as an independent, investigator-initiated study supported through a grant from Boehringer Ingelheim Pharmaceuticals, Inc (BIPI). BIPI had no role in the design, analysis, or interpretation of the results in this study; BIPI was given the opportunity to review the manuscript for medical and scientific accuracy as it relates to BIPI substances, as well as intellectual property considerations. The funding was provided to the institution.

Please place an "X" next to the following statement to indicate your agreement:

I certify that I have answered every question and have not altered the wording of any of the questions on this form.

## ICMJE DISCLOSURE FORM

Date: 4/11/2024

Your Name: Jeffrey Ward

Manuscript Title: A pilot study of nintedanib in molecularly selected patients with advanced non-small cell lung cancer

Manuscript number (if known): \_\_\_\_\_

In the interest of transparency, we ask you to disclose all relationships/activities/interests listed below that are related to the content of your manuscript. "Related" means any relation with for-profit or not-for-profit third parties whose interests may be affected by the content of the manuscript. Disclosure represents a commitment to transparency and does not necessarily indicate a bias. If you are in doubt about whether to list a relationship/activity/interest, it is preferable that you do so.

The following questions apply to the author's relationships/activities/interests as they relate to the current manuscript only.

The author's relationships/activities/interests should be defined broadly. For example, if your manuscript pertains to the epidemiology of hypertension, you should declare all relationships with manufacturers of antihypertensive medication, even if that medication is not mentioned in the manuscript.

In item #1 below, report all support for the work reported in this manuscript without time limit. For all other items, the time frame for disclosure is the past 36 months.

|                                                           |                                                                                                                                                                                | Name all entities with whom you have this relationship or indicate none (add rows as needed)                                                                                                                                                                                                                                                                                                                                                                                                                  | Specifications/Comments (e.g., if payments were made to you or to your institution) |
|-----------------------------------------------------------|--------------------------------------------------------------------------------------------------------------------------------------------------------------------------------|---------------------------------------------------------------------------------------------------------------------------------------------------------------------------------------------------------------------------------------------------------------------------------------------------------------------------------------------------------------------------------------------------------------------------------------------------------------------------------------------------------------|-------------------------------------------------------------------------------------|
| <b>Time frame: Since the initial planning of the work</b> |                                                                                                                                                                                |                                                                                                                                                                                                                                                                                                                                                                                                                                                                                                               |                                                                                     |
| 1                                                         | All support for the present manuscript (e.g., funding, provision of study materials, medical writing, article processing charges, etc.)<br><b>No time limit for this item.</b> | This study was funded by the National Comprehensive Cancer Network (NCCN) Oncology Research Program as an independent, investigator-initiated study supported through a grant from Boehringer Ingelheim Pharmaceuticals, Inc (BIPI). BIPI had no role in the design, analysis, or interpretation of the results in this study; BIPI was given the opportunity to review the manuscript for medical and scientific accuracy as it relates to BIPI substances, as well as intellectual property considerations. | Institution                                                                         |
|                                                           |                                                                                                                                                                                |                                                                                                                                                                                                                                                                                                                                                                                                                                                                                                               |                                                                                     |
|                                                           |                                                                                                                                                                                |                                                                                                                                                                                                                                                                                                                                                                                                                                                                                                               |                                                                                     |
|                                                           |                                                                                                                                                                                |                                                                                                                                                                                                                                                                                                                                                                                                                                                                                                               |                                                                                     |



|                                   |                                                                                                              |                                          |  |
|-----------------------------------|--------------------------------------------------------------------------------------------------------------|------------------------------------------|--|
|                                   |                                                                                                              |                                          |  |
|                                   |                                                                                                              |                                          |  |
| <b>Time frame: past 36 months</b> |                                                                                                              |                                          |  |
| 2                                 | Grants or contracts from any entity (if not indicated in item #1 above).                                     | <input checked="" type="checkbox"/> None |  |
| 3                                 | Royalties or licenses                                                                                        | <input checked="" type="checkbox"/> None |  |
| 4                                 | Consulting fees                                                                                              | <input checked="" type="checkbox"/> None |  |
| 5                                 | Payment or honoraria for lectures, presentations, speakers bureaus, manuscript writing or educational events | <input checked="" type="checkbox"/> None |  |
| 6                                 | Payment for expert testimony                                                                                 | <input checked="" type="checkbox"/> None |  |
| 7                                 | Support for attending meetings and/or travel                                                                 | <input checked="" type="checkbox"/> None |  |
| 8                                 | Patents planned, issued or pending                                                                           | <input checked="" type="checkbox"/> None |  |
| 9                                 | Participation on a Data Safety Monitoring Board or Advisory Board                                            | <input checked="" type="checkbox"/> None |  |
| 10                                | Leadership or fiduciary role in other board, society, committee or advocacy group, paid or unpaid            | <input checked="" type="checkbox"/> None |  |
| 11                                | Stock or stock options                                                                                       | <input checked="" type="checkbox"/> None |  |
| 12                                | Receipt of equipment, materials, drugs, medical writing, gifts or other services                             | <input checked="" type="checkbox"/> None |  |
| 13                                | Other financial or non-financial interests                                                                   | <input checked="" type="checkbox"/> None |  |

**Please summarize the above conflict of interest in the following box:**

This study was funded by the National Comprehensive Cancer Network (NCCN) Oncology Research Program as an independent, investigator-initiated study supported through a grant from Boehringer Ingelheim Pharmaceuticals, Inc (BIPI). BIPI had no role in the design, analysis, or interpretation of the results in this study; BIPI was given the opportunity to review the manuscript for medical and scientific accuracy as it relates to BIPI substances, as well as intellectual property considerations. The funding was provided to the institution.

**Please place an "X" next to the following statement to indicate your agreement:**

**I certify that I have answered every question and have not altered the wording of any of the questions on this form.**

## ICMJE DISCLOSURE FORM

Date: 4/11/2024

Your Name: Siddhartha Devarakonda

Manuscript Title: A pilot study of nintedanib in molecularly selected patients with advanced non-small cell lung cancer

Manuscript number (if known): \_\_\_\_\_

In the interest of transparency, we ask you to disclose all relationships/activities/interests listed below that are related to the content of your manuscript. "Related" means any relation with for-profit or not-for-profit third parties whose interests may be affected by the content of the manuscript. Disclosure represents a commitment to transparency and does not necessarily indicate a bias. If you are in doubt about whether to list a relationship/activity/interest, it is preferable that you do so.

The following questions apply to the author's relationships/activities/interests as they relate to the current manuscript only.

The author's relationships/activities/interests should be defined broadly. For example, if your manuscript pertains to the epidemiology of hypertension, you should declare all relationships with manufacturers of antihypertensive medication, even if that medication is not mentioned in the manuscript.

In item #1 below, report all support for the work reported in this manuscript without time limit. For all other items, the time frame for disclosure is the past 36 months.

|                                                           |                                                                                                                                                                                | Name all entities with whom you have this relationship or indicate none (add rows as needed)                                                                                                                                                                                                                            | Specifications/Comments (e.g., if payments were made to you or to your institution) |
|-----------------------------------------------------------|--------------------------------------------------------------------------------------------------------------------------------------------------------------------------------|-------------------------------------------------------------------------------------------------------------------------------------------------------------------------------------------------------------------------------------------------------------------------------------------------------------------------|-------------------------------------------------------------------------------------|
| <b>Time frame: Since the initial planning of the work</b> |                                                                                                                                                                                |                                                                                                                                                                                                                                                                                                                         |                                                                                     |
| 1                                                         | All support for the present manuscript (e.g., funding, provision of study materials, medical writing, article processing charges, etc.)<br><b>No time limit for this item.</b> | This study was funded by the National Comprehensive Cancer Network (NCCN) Oncology Research Program as an independent, investigator-initiated study supported through a grant from Boehringer Ingelheim Pharmaceuticals, Inc (BIPI). BIPI had no role in the design, analysis, or interpretation of the results in this | Institution                                                                         |

|                                   |                                                                                                              |                                                                                                                                                                                       |                                   |
|-----------------------------------|--------------------------------------------------------------------------------------------------------------|---------------------------------------------------------------------------------------------------------------------------------------------------------------------------------------|-----------------------------------|
|                                   |                                                                                                              | study; BIPI was given the opportunity to review the manuscript for medical and scientific accuracy as it relates to BIPI substances, as well as intellectual property considerations. |                                   |
|                                   |                                                                                                              |                                                                                                                                                                                       |                                   |
|                                   |                                                                                                              |                                                                                                                                                                                       |                                   |
|                                   |                                                                                                              |                                                                                                                                                                                       |                                   |
|                                   |                                                                                                              |                                                                                                                                                                                       |                                   |
|                                   |                                                                                                              |                                                                                                                                                                                       |                                   |
|                                   |                                                                                                              |                                                                                                                                                                                       |                                   |
| <b>Time frame: past 36 months</b> |                                                                                                              |                                                                                                                                                                                       |                                   |
| 2                                 | Grants or contracts from any entity (if not indicated in item #1 above).                                     | ___ None                                                                                                                                                                              |                                   |
|                                   |                                                                                                              |                                                                                                                                                                                       |                                   |
| 3                                 | Royalties or licenses                                                                                        | Springer publications                                                                                                                                                                 | Cancer genomics for the clinician |
|                                   |                                                                                                              |                                                                                                                                                                                       |                                   |
| 4                                 | Consulting fees                                                                                              | ___ None                                                                                                                                                                              |                                   |
|                                   |                                                                                                              |                                                                                                                                                                                       |                                   |
| 5                                 | Payment or honoraria for lectures, presentations, speakers bureaus, manuscript writing or educational events | Astra Zeneca<br>Genentech<br>Merus<br>Jazz Pharmaceuticals                                                                                                                            | Advisory board                    |
|                                   |                                                                                                              |                                                                                                                                                                                       |                                   |
| 6                                 | Payment for expert testimony                                                                                 | ___ None                                                                                                                                                                              |                                   |
|                                   |                                                                                                              |                                                                                                                                                                                       |                                   |
| 7                                 | Support for attending meetings and/or travel                                                                 | ___ None                                                                                                                                                                              |                                   |
|                                   |                                                                                                              |                                                                                                                                                                                       |                                   |
| 8                                 | Patents planned, issued or pending                                                                           | ___ None                                                                                                                                                                              |                                   |
|                                   |                                                                                                              |                                                                                                                                                                                       |                                   |
| 9                                 | Participation on a Data Safety Monitoring Board or Advisory Board                                            | ___ None                                                                                                                                                                              |                                   |
|                                   |                                                                                                              |                                                                                                                                                                                       |                                   |
| 10                                | Leadership or fiduciary role in other board, society,                                                        | ___ None                                                                                                                                                                              |                                   |
|                                   |                                                                                                              |                                                                                                                                                                                       |                                   |

|    |                                                                                  |                  |  |
|----|----------------------------------------------------------------------------------|------------------|--|
|    | committee or advocacy group, paid or unpaid                                      |                  |  |
| 11 | Stock or stock options                                                           | <u>    </u> None |  |
|    |                                                                                  |                  |  |
|    |                                                                                  |                  |  |
| 12 | Receipt of equipment, materials, drugs, medical writing, gifts or other services | <u>    </u> None |  |
|    |                                                                                  |                  |  |
|    |                                                                                  |                  |  |
| 13 | Other financial or non-financial interests                                       | <u>    </u> None |  |
|    |                                                                                  |                  |  |
|    |                                                                                  |                  |  |

**Please summarize the above conflict of interest in the following box:**

SD received honoraria from Astra Zeneca, Genentech, Merus and Jazz pharmaceuticals for advisory board participation.

This study was funded by the National Comprehensive Cancer Network (NCCN) Oncology Research Program as an independent, investigator-initiated study supported through a grant from Boehringer Ingelheim Pharmaceuticals, Inc (BIPI). BIPI had no role in the design, analysis, or interpretation of the results in this study; BIPI was given the opportunity to review the manuscript for medical and scientific accuracy as it relates to BIPI substances, as well as intellectual property considerations. The funding was provided to the institution.

**Please place an “X” next to the following statement to indicate your agreement:**

  X   I certify that I have answered every question and have not altered the wording of any of the questions on this form.

## ICMJE DISCLOSURE FORM

Date: 4/11/2024  
 Your Name: Timothy P. Rearden, MD  
 Manuscript Title: A pilot study of nintedanib in molecularly selected patients with advanced non-small cell lung cancer  
 Manuscript number (if known): \_\_\_\_\_

In the interest of transparency, we ask you to disclose all relationships/activities/interests listed below that are related to the content of your manuscript. "Related" means any relation with for-profit or not-for-profit third parties whose interests may be affected by the content of the manuscript. Disclosure represents a commitment to transparency and does not necessarily indicate a bias. If you are in doubt about whether to list a relationship/activity/interest, it is preferable that you do so.

The following questions apply to the author's relationships/activities/interests as they relate to the current manuscript only.

The author's relationships/activities/interests should be defined broadly. For example, if your manuscript pertains to the epidemiology of hypertension, you should declare all relationships with manufacturers of antihypertensive medication, even if that medication is not mentioned in the manuscript.

In item #1 below, report all support for the work reported in this manuscript without time limit. For all other items, the time frame for disclosure is the past 36 months.

|                                                           |                                                                                                                                                                                | Name all entities with whom you have this relationship or indicate none (add rows as needed)                                                                                                                                                                                                                            | Specifications/Comments (e.g., if payments were made to you or to your institution) |
|-----------------------------------------------------------|--------------------------------------------------------------------------------------------------------------------------------------------------------------------------------|-------------------------------------------------------------------------------------------------------------------------------------------------------------------------------------------------------------------------------------------------------------------------------------------------------------------------|-------------------------------------------------------------------------------------|
| <b>Time frame: Since the initial planning of the work</b> |                                                                                                                                                                                |                                                                                                                                                                                                                                                                                                                         |                                                                                     |
| 1                                                         | All support for the present manuscript (e.g., funding, provision of study materials, medical writing, article processing charges, etc.)<br><b>No time limit for this item.</b> | This study was funded by the National Comprehensive Cancer Network (NCCN) Oncology Research Program as an independent, investigator-initiated study supported through a grant from Boehringer Ingelheim Pharmaceuticals, Inc (BIPI). BIPI had no role in the design, analysis, or interpretation of the results in this | Funding to institution                                                              |

|  |  |                                                                                                                                                                                       |  |
|--|--|---------------------------------------------------------------------------------------------------------------------------------------------------------------------------------------|--|
|  |  | study; BIPI was given the opportunity to review the manuscript for medical and scientific accuracy as it relates to BIPI substances, as well as intellectual property considerations. |  |
|  |  |                                                                                                                                                                                       |  |
|  |  |                                                                                                                                                                                       |  |
|  |  |                                                                                                                                                                                       |  |
|  |  |                                                                                                                                                                                       |  |
|  |  |                                                                                                                                                                                       |  |
|  |  |                                                                                                                                                                                       |  |

**Time frame: past 36 months**

|    |                                                                                                              |                                          |  |
|----|--------------------------------------------------------------------------------------------------------------|------------------------------------------|--|
| 2  | Grants or contracts from any entity (if not indicated in item #1 above).                                     | <input checked="" type="checkbox"/> None |  |
|    |                                                                                                              |                                          |  |
| 3  | Royalties or licenses                                                                                        | <input checked="" type="checkbox"/> None |  |
|    |                                                                                                              |                                          |  |
| 4  | Consulting fees                                                                                              | <input checked="" type="checkbox"/> None |  |
|    |                                                                                                              |                                          |  |
| 5  | Payment or honoraria for lectures, presentations, speakers bureaus, manuscript writing or educational events | <input checked="" type="checkbox"/> None |  |
|    |                                                                                                              |                                          |  |
| 6  | Payment for expert testimony                                                                                 | <input checked="" type="checkbox"/> None |  |
|    |                                                                                                              |                                          |  |
| 7  | Support for attending meetings and/or travel                                                                 | <input checked="" type="checkbox"/> None |  |
|    |                                                                                                              |                                          |  |
| 8  | Patents planned, issued or pending                                                                           | <input checked="" type="checkbox"/> None |  |
|    |                                                                                                              |                                          |  |
| 9  | Participation on a Data Safety Monitoring Board or Advisory Board                                            | <input checked="" type="checkbox"/> None |  |
|    |                                                                                                              |                                          |  |
| 10 | Leadership or fiduciary role in other board, society, committee or advocacy group, paid or unpaid            | <input checked="" type="checkbox"/> None |  |
|    |                                                                                                              |                                          |  |

|    |                                                                                  |                                          |  |
|----|----------------------------------------------------------------------------------|------------------------------------------|--|
| 11 | Stock or stock options                                                           | <input checked="" type="checkbox"/> None |  |
|    |                                                                                  |                                          |  |
|    |                                                                                  |                                          |  |
| 12 | Receipt of equipment, materials, drugs, medical writing, gifts or other services | <input checked="" type="checkbox"/> None |  |
|    |                                                                                  |                                          |  |
|    |                                                                                  |                                          |  |
| 13 | Other financial or non-financial interests                                       | <input checked="" type="checkbox"/> None |  |
|    |                                                                                  |                                          |  |
|    |                                                                                  |                                          |  |

**Please summarize the above conflict of interest in the following box:**

This study was funded by the National Comprehensive Cancer Network (NCCN) Oncology Research Program as an independent, investigator-initiated study supported through a grant from Boehringer Ingelheim Pharmaceuticals, Inc (BIPI). BIPI had no role in the design, analysis, or interpretation of the results in this study; BIPI was given the opportunity to review the manuscript for medical and scientific accuracy as it relates to BIPI substances, as well as intellectual property considerations. The funding was provided to the institution.

**Please place an "X" next to the following statement to indicate your agreement:**

I certify that I have answered every question and have not altered the wording of any of the questions on this form.



## ICMJE DISCLOSURE FORM

Date: 4/11/2024

Your Name: Ramaswamy Govindan

Manuscript Title: A pilot study of nintedanib in molecularly selected patients with advanced non-small cell lung cancer

Manuscript number (if known): \_\_\_\_\_

In the interest of transparency, we ask you to disclose all relationships/activities/interests listed below that are related to the content of your manuscript. "Related" means any relation with for-profit or not-for-profit third parties whose interests may be affected by the content of the manuscript. Disclosure represents a commitment to transparency and does not necessarily indicate a bias. If you are in doubt about whether to list a relationship/activity/interest, it is preferable that you do so.

The following questions apply to the author's relationships/activities/interests as they relate to the current manuscript only.

The author's relationships/activities/interests should be defined broadly. For example, if your manuscript pertains to the epidemiology of hypertension, you should declare all relationships with manufacturers of antihypertensive medication, even if that medication is not mentioned in the manuscript.

In item #1 below, report all support for the work reported in this manuscript without time limit. For all other items, the time frame for disclosure is the past 36 months.

|                                                           |                                                                                                                                                                                | Name all entities with whom you have this relationship or indicate none (add rows as needed)                                                                                                                                                                                                                                                                                                                                                                                                                  | Specifications/Comments (e.g., if payments were made to you or to your institution) |
|-----------------------------------------------------------|--------------------------------------------------------------------------------------------------------------------------------------------------------------------------------|---------------------------------------------------------------------------------------------------------------------------------------------------------------------------------------------------------------------------------------------------------------------------------------------------------------------------------------------------------------------------------------------------------------------------------------------------------------------------------------------------------------|-------------------------------------------------------------------------------------|
| <b>Time frame: Since the initial planning of the work</b> |                                                                                                                                                                                |                                                                                                                                                                                                                                                                                                                                                                                                                                                                                                               |                                                                                     |
| 1                                                         | All support for the present manuscript (e.g., funding, provision of study materials, medical writing, article processing charges, etc.)<br><b>No time limit for this item.</b> | This study was funded by the National Comprehensive Cancer Network (NCCN) Oncology Research Program as an independent, investigator-initiated study supported through a grant from Boehringer Ingelheim Pharmaceuticals, Inc (BIPI). BIPI had no role in the design, analysis, or interpretation of the results in this study; BIPI was given the opportunity to review the manuscript for medical and scientific accuracy as it relates to BIPI substances, as well as intellectual property considerations. | Funding to the institution                                                          |
|                                                           |                                                                                                                                                                                |                                                                                                                                                                                                                                                                                                                                                                                                                                                                                                               |                                                                                     |
|                                                           |                                                                                                                                                                                |                                                                                                                                                                                                                                                                                                                                                                                                                                                                                                               |                                                                                     |
|                                                           |                                                                                                                                                                                |                                                                                                                                                                                                                                                                                                                                                                                                                                                                                                               |                                                                                     |
|                                                           |                                                                                                                                                                                |                                                                                                                                                                                                                                                                                                                                                                                                                                                                                                               |                                                                                     |
|                                                           |                                                                                                                                                                                |                                                                                                                                                                                                                                                                                                                                                                                                                                                                                                               |                                                                                     |
| <b>Time frame: past 36 months</b>                         |                                                                                                                                                                                |                                                                                                                                                                                                                                                                                                                                                                                                                                                                                                               |                                                                                     |
| 2                                                         | Grants or contracts from                                                                                                                                                       | <u> X </u> None                                                                                                                                                                                                                                                                                                                                                                                                                                                                                               |                                                                                     |

|    |                                                                                                              |                                          |  |
|----|--------------------------------------------------------------------------------------------------------------|------------------------------------------|--|
|    | any entity (if not indicated in item #1 above).                                                              |                                          |  |
| 3  | Royalties or licenses                                                                                        | <input checked="" type="checkbox"/> None |  |
| 4  | Consulting fees                                                                                              | <input checked="" type="checkbox"/> None |  |
| 5  | Payment or honoraria for lectures, presentations, speakers bureaus, manuscript writing or educational events | <input checked="" type="checkbox"/> None |  |
| 6  | Payment for expert testimony                                                                                 | <input checked="" type="checkbox"/> None |  |
| 7  | Support for attending meetings and/or travel                                                                 | <input checked="" type="checkbox"/> None |  |
| 8  | Patents planned, issued or pending                                                                           | <input checked="" type="checkbox"/> None |  |
| 9  | Participation on a Data Safety Monitoring Board or Advisory Board                                            | <input checked="" type="checkbox"/> None |  |
| 10 | Leadership or fiduciary role in other board, society, committee or advocacy group, paid or unpaid            | <input checked="" type="checkbox"/> None |  |
| 11 | Stock or stock options                                                                                       | <input checked="" type="checkbox"/> None |  |
| 12 | Receipt of equipment, materials, drugs, medical writing, gifts or other services                             | <input checked="" type="checkbox"/> None |  |
| 13 | Other financial or non-financial interests                                                                   | <input checked="" type="checkbox"/> None |  |

**Please summarize the above conflict of interest in the following box:**

This study was funded by the National Comprehensive Cancer Network (NCCN) Oncology Research Program as an independent, investigator-initiated study supported through a grant from Boehringer Ingelheim Pharmaceuticals, Inc (BIPI). BIPI had no role in the design, analysis, or interpretation of the results in this study; BIPI was given the opportunity to review the manuscript for medical and scientific accuracy as it relates to BIPI substances, as well as intellectual property considerations. The funding was provided to my institution.

Please place an "X" next to the following statement to indicate your agreement:

I certify that I have answered every question and have not altered the wording of any of the questions on this form.

## ICMJE DISCLOSURE FORM

Date: 4/11/2024

Your Name: Saiama N. Waqar

Manuscript Title: A pilot study of nintedanib in molecularly selected patients with advanced non-small cell lung cancer

Manuscript number (if known): \_\_\_\_\_

In the interest of transparency, we ask you to disclose all relationships/activities/interests listed below that are related to the content of your manuscript. "Related" means any relation with for-profit or not-for-profit third parties whose interests may be affected by the content of the manuscript. Disclosure represents a commitment to transparency and does not necessarily indicate a bias. If you are in doubt about whether to list a relationship/activity/interest, it is preferable that you do so.

The following questions apply to the author's relationships/activities/interests as they relate to the current manuscript only.

The author's relationships/activities/interests should be defined broadly. For example, if your manuscript pertains to the epidemiology of hypertension, you should declare all relationships with manufacturers of antihypertensive medication, even if that medication is not mentioned in the manuscript.

In item #1 below, report all support for the work reported in this manuscript without time limit. For all other items, the time frame for disclosure is the past 36 months.

|                                                           |                                                                                                                                                                                | Name all entities with whom you have this relationship or indicate none (add rows as needed)                                                                                                                                                                                                                            | Specifications/Comments (e.g., if payments were made to you or to your institution) |
|-----------------------------------------------------------|--------------------------------------------------------------------------------------------------------------------------------------------------------------------------------|-------------------------------------------------------------------------------------------------------------------------------------------------------------------------------------------------------------------------------------------------------------------------------------------------------------------------|-------------------------------------------------------------------------------------|
| <b>Time frame: Since the initial planning of the work</b> |                                                                                                                                                                                |                                                                                                                                                                                                                                                                                                                         |                                                                                     |
| 1                                                         | All support for the present manuscript (e.g., funding, provision of study materials, medical writing, article processing charges, etc.)<br><b>No time limit for this item.</b> | This study was funded by the National Comprehensive Cancer Network (NCCN) Oncology Research Program as an independent, investigator-initiated study supported through a grant from Boehringer Ingelheim Pharmaceuticals, Inc (BIPI). BIPI had no role in the design, analysis, or interpretation of the results in this | Funding to institution                                                              |

|                                   |                                                                          |                                                                                                                                                                                                                                                         |                        |
|-----------------------------------|--------------------------------------------------------------------------|---------------------------------------------------------------------------------------------------------------------------------------------------------------------------------------------------------------------------------------------------------|------------------------|
|                                   |                                                                          | study; BIPI was given the opportunity to review the manuscript for medical and scientific accuracy as it relates to BIPI substances, as well as intellectual property considerations.                                                                   |                        |
|                                   |                                                                          |                                                                                                                                                                                                                                                         |                        |
|                                   |                                                                          |                                                                                                                                                                                                                                                         |                        |
|                                   |                                                                          |                                                                                                                                                                                                                                                         |                        |
|                                   |                                                                          |                                                                                                                                                                                                                                                         |                        |
|                                   |                                                                          |                                                                                                                                                                                                                                                         |                        |
|                                   |                                                                          |                                                                                                                                                                                                                                                         |                        |
| <b>Time frame: past 36 months</b> |                                                                          |                                                                                                                                                                                                                                                         |                        |
| 2                                 | Grants or contracts from any entity (if not indicated in item #1 above). | SWOG-Clinical Trials Partnership: This funding provides effort for Dr. Waqar to support and oversee the Lung-MAP master protocol and sub study activities.                                                                                              | Funding to institution |
|                                   |                                                                          | American Society of Hematology- ASH Hematology-Focused Fellowship Training Program (HFFTP)                                                                                                                                                              | Funding to institution |
|                                   |                                                                          | Site PI for clinical trials: AbbVie, Gilead, Immunomedics, Inc., , Daiichi Sankyo, Cullinan Pearl, Verastem Inc, Janssen Research & Development, LLC ,Elevation Oncology, Genentech, Verastem, Advenchen, Ribon, Loxo Oncology, Takeda, Hoffman-LaRoche | Funding to institution |
| 3                                 | Royalties or licenses                                                    | None                                                                                                                                                                                                                                                    |                        |
|                                   |                                                                          |                                                                                                                                                                                                                                                         |                        |
|                                   |                                                                          |                                                                                                                                                                                                                                                         |                        |
| 4                                 | Consulting fees                                                          | None                                                                                                                                                                                                                                                    |                        |
|                                   |                                                                          |                                                                                                                                                                                                                                                         |                        |
|                                   |                                                                          |                                                                                                                                                                                                                                                         |                        |
| 5                                 | Payment or honoraria for lectures, presentations,                        | ASCO, MJH Life Sciences (OnLive)                                                                                                                                                                                                                        | Self                   |

|    |                                                                                                   |                                                                        |      |
|----|---------------------------------------------------------------------------------------------------|------------------------------------------------------------------------|------|
|    | speakers bureaus, manuscript writing or educational events                                        |                                                                        |      |
| 6  | Payment for expert testimony                                                                      | ___ None                                                               |      |
| 7  | Support for attending meetings and/or travel                                                      | Gilead                                                                 | Self |
| 8  | Patents planned, issued or pending                                                                | ___ None                                                               |      |
| 9  | Participation on a Data Safety Monitoring Board or Advisory Board                                 | Advisory boards for Janssen, Gilead and Astra Zeneca                   | Self |
|    |                                                                                                   | Data safety monitoring board for Hossier Cancer Research Network Study | Self |
| 10 | Leadership or fiduciary role in other board, society, committee or advocacy group, paid or unpaid | ___ None                                                               |      |
| 11 | Stock or stock options                                                                            | ___ None                                                               |      |
| 12 | Receipt of equipment, materials, drugs, medical writing, gifts or other services                  | ___ None                                                               |      |
| 13 | Other financial or non-financial interests                                                        | ___ None                                                               |      |

**Please summarize the above conflict of interest in the following box:**

This study was funded by the National Comprehensive Cancer Network (NCCN) Oncology Research Program as an independent, investigator-initiated study supported through a grant from Boehringer Ingelheim Pharmaceuticals, Inc (BIPI). BIPI had no role in the design, analysis, or interpretation of the results in this study; BIPI was given the opportunity to review the manuscript for medical and scientific accuracy as it relates to BIPI substances, as well as intellectual property considerations. The funding was provided to my institution.

SW also reports research funding from SWOG-Clinical Trials Partnership, American Society of Hematology, AbbVie, Gilead, Immunomedics Inc, Daiichi Sankyo, Cullinan Pearl, Verastem Inc, Janssen Research and Development LLC, Elevation Oncology, Genentech, Verastem, Advenchen, Ribon, Loxo Oncology, Takeda, Hoffman-LaRoche, honoraria from ASCO, MJH Life Sciences, travel support from Gilead, and advisory roles for Janssen, Gilead, AstraZeneca, and Hoosier Cancer Research Network.

Please place an "X" next to the following statement to indicate your agreement:

I certify that I have answered every question and have not altered the wording of any of the questions on this form.
